# Supplementary material
Source: Elsevier journal article supplement (https://www.sciencedirect.com/science/article/pii/S1575181322000237)
Supplement: mmc1 [file S1575181322000237:mmc1.pdf]

## **ANEXO.**

### **Propuesta de estándares de acreditación de alta calidad específicos para programas de medicina de pregrado; basado en el modelo CNA – Colombia y WFME – World Federation for Medical Education, con énfasis en el modelo de atención primaria en salud - APS**

De acuerdo con las fortalezas y debilidades identificadas a partir de la revisión y comparación de los modelos de acreditación del SAC y WFME, y considerando la estrategia de atención primaria en salud -APS-, se proponen los siguientes estándares de acreditación de alta calidad para programas de pregrado en medicina para Colombia, los cuales se rigen por los principios del CNA (2013), a saber: Universalidad, integridad, equidad, idoneidad responsabilidad, coherencia, transparencia, pertinencia eficacia, eficiencia y sostenibilidad.

Y como objetivos fundamentales, se respetan y conservan también los definidos por CNA (2013), dado que son pertinentes al medio e intereses del sistema:

- a) Ser un mecanismo para que las instituciones de educación superior rindan cuentas ante la sociedad y el Estado sobre el servicio educativo que prestan.
- b) Ser un instrumento mediante el cual el Estado da fe pública de la calidad de los programas de educación superior.
- c) Fomentar procesos de autoevaluación y mejoramiento continuo hacia el logro de altos niveles de calidad en la Educación Superior.
- d) Estimular el mejoramiento de la calidad de la Educación Superior.
- e) Propiciar la idoneidad y la solidez de programas académicos de educación superior.

- f) Ser un incentivo para los académicos, en la medida en que permita la credibilidad de su trabajo y propicie el reconocimiento de sus realizaciones.
- g) Favorecer la movilidad y reconocimiento nacional e internacional de estudiantes y profesores.
- h) Ser reconocido por organismos internacionales, instituciones de educación superior del exterior y sistemas externos de aseguramiento de la calidad.
- i) Favorecer la construcción y consolidación de comunidades académicas y científicas.
- j) Fortalecer las funciones sustantivas en atención a los enunciados misionales institucionales y al contexto en el cual se insertan.

### **Metodología y estructura**

Los estándares están estructurados en 7 Factores, cada uno de cuales a su vez se despliega en Características, para un total de 33.

Se definen los factores como componentes amplios de la estructura, proceso y resultados de la educación médica, y cubren:

- Factor 1. Misión, autonomía institucional y libertad académica, relevancia académica y pertinencia social del programa, con 4 características
- Factor 2. Proyecto educativo del programa y resultados educativos, con 11 características
- Factor 3. Estudiantes, con 5 características
- Factor 4. Personal académico – docentes, con 3 características

- Factor 5. Recursos educativos, con 5 características
- Factor 6. Bienestar institucional, con 2 características
- Factor 7. Organización, administración y gestión, con 3 características

Las características se definen como aspectos más específicos que se desprenden del factor y corresponden a niveles más operativos del mismo.

Los ESTÁNDARES son específicos para cada característica y se manejan en dos niveles:

- **Estándares básicos:** Son los que han de cumplir todos los programas, y su cumplimiento ha de

quedar de manifiesto en la evaluación del programa. Los estándares básicos se enuncian con la

expresión “debe”.

- **Estándares para el desarrollo de la calidad:** Son los que reflejan el consenso internacional

sobre la mejor práctica para los programas de educación médica básica. El cumplimiento o iniciativas para cumplir algunos o todos los estándares, deben ser documentados por las facultades. El cumplimiento de los estándares dependerá del estadio de desarrollo de cada facultad, sus recursos y su política educativa. Incluso las facultades más avanzadas pueden no cumplir todos estos estándares. Los estándares para el desarrollo de la calidad se enuncian con la expresión “debería”.

## **FACTOR 1. MISIÓN, AUTONOMÍA INSTITUCIONAL Y LIBERTAD ACADÉMICA, RELEVANCIA ACADÉMICA Y PERTINENCIA SOCIAL DEL PROGRAMA**

### **CARACTERÍSTICA N.º 1 Misión, Visión, Objetivos y políticas del programa**

#### **Estándares básicos:**

El Programa debe cumplir y demostrar que:

- 1.1.1 Se define formalmente su misión y visión.
- 1.1.2 La misión y la visión se despliegan por medio de objetivos claros, medibles y cumplibles, así como, políticas propias y/o la incorporación de políticas superiores institucionales o sectoriales relacionadas (salud, educación, trabajo), política de inclusión étnica, social, de comunicación, de género, económica, de discapacidad, entre otros aspectos inherentes a la diversidad del ser humano).
- 1.1.3 La misión, visión, objetivos y políticas del programa son coherentes y complementarios con sus homólogos institucionales.
- 1.1.4 La misión, visión, objetivos y políticas del programa constituyen el marco de referencia para la definición, desarrollo, seguimiento y mejora de los procesos académicos y administrativos: Gestión del currículo, docencia, investigación, internacionalización, proyección social, bienestar institucional, práctica docente, relaciones con el sistema de salud; y esbozan los objetivos, mecanismos y recursos necesarios para garantizar la idoneidad y pertinencia de sus egresados

en los diferentes aspectos formativos, así como, su adecuado desempeño en el sistema de salud.

1.1.5 En la definición de la misión, visión y objetivos del programa se tendrá en cuenta aspectos internos y externos como:

- Plataforma estratégica de la Universidad
- Las necesidades del sector y el sistema de salud
- Principios de la atención primaria en salud
- Planes nacionales, locales, sectoriales o intersectoriales, pertinentes a los propósitos del programa.
- Necesidades de la sociedad en materia de salud

1.1.6 La misión, visión, objetivos y políticas del programa deben ser difundidas interna y externamente a docentes, estudiantes, comunidad universitaria, sociedad y sector salud.

### **Estándares de mejoramiento**

La misión, visión, objetivos deberían contemplar aspectos como:

- Internacionalización, movilidad estudiantil y docente.
- Visión y proyección de la salud, educación y trabajo en los ámbitos nacionales, regionales y globales.

- Investigación médica, proyección e integración del pregrado con la educación post-gradual (especializaciones, educación continua y autoformación permanente).

## CARACTERÍSTICA N° 2 Autonomía institucional y libertad académica

### **Estándares básicos**

La autonomía del programa debe verse reflejada en la capacidad para tomar decisiones y definir directrices independientes en materia de:

1.2.1 Diseño del currículo

1.2.2 Definición y administración de los recursos necesarios para la implementación del currículo

1.2.3 Admisión de estudiantes

1.2.4 Evaluaciones

1.2.5 Selección, contratación y remuneración de personal docente y administrativo

1.2.6 Selección, seguimiento y relacionamiento con sitios de práctica

### **Estándares de mejoramiento**

La autonomía del programa debería extenderse a aspectos como:

- Investigación
- Internacionalización y movilidad estudiantil y docente

- Relacionamiento con entes gubernamentales, del sector salud, comunidad e industria tecnológica o farmacéutica
- Libertad de expresión, investigación y publicación para estudiantes y docentes

CARACTERÍSTICA N° 3 Participación en la formulación de la misión y los resultados educativos

### **Estándares básicos**

**1.3.1** La construcción debe ser un proceso participativo en el que se consideren las necesidades y expectativas de diferentes partes interesadas como: La facultad, la universidad, la sociedad, el sistema de salud, docentes, personal administrativo, estudiantes y familias.

### **Estándares de mejoramiento**

La construcción debería incluir la participación de sectores gubernamentales, regulativos, sociales, de salud, educación y trabajo, agremiaciones de pacientes, otras profesiones de la salud, organizaciones científicas, egresados, docentes de postgrado, sector productivo de la salud y la industria.

CARACTERÍSTICA N° 4 Relevancia académica y pertinencia social del programa

### **Estándares básicos**

El programa es relevante académicamente y responde a necesidades locales, regionales, nacionales e internacionales, lo cual se debe fundamentar en:

- 1.4.1 Análisis realizados sobre las tendencias y líneas de desarrollo del ejercicio médico en el ámbito local, regional, nacional e internacional, y su incidencia en el programa.
- 1.4.2 Estudios orientados a identificar las necesidades y requerimientos del entorno laboral (local, regional y nacional) en términos productivos y de competitividad, tecnológicos y de talento humano. Acciones del programa para atenderlos.
- 1.4.3 Estudios que demuestren la necesidad social del programa en la metodología que se ofrece.
- 1.4.4 Correspondencia entre el perfil laboral y ocupacional del sector y el perfil profesional expresado en el Proyecto Educativo del Programa.
- 1.4.5 Estudios y/o proyectos formulados o en desarrollo, que propendan por la modernización, actualización y pertinencia del currículo de acuerdo con las necesidades del entorno.
- 1.4.6 Estudios actualizados sobre las necesidades formativas en la región de influencia del programa.
- 1.4.7 Cambios en el plan de estudios, resultantes de experiencias relativas al análisis y propuestas de solución a los problemas del contexto.
- 1.4.8 Proyectos que adelanta el programa, mediante sus funciones de docencia, investigación, innovación, creación artística y cultural, y extensión, tendientes a ejercer un impacto sobre el medio, de acuerdo con el Proyecto Educativo del Programa.



1.4.9 Estudios orientados a evaluar el impacto del programa con respecto al cumplimiento de sus propósitos y objetivos, así como la incidencia en el entorno social y su grupo de referencia disciplinar o profesional.

1.4.10 Coherencia y pertinencia con los lineamientos y principios de la atención primaria en salud como fundamento de la formación médica en pregrado.

### **Estándares de mejoramiento**

- La relevancia y pertinencia del programa debería enmarcarse en las tendencias futuras en materia de salud en los ámbitos regionales, nacionales y mundiales.

## **FACTOR 2 PROYECTO EDUCATIVO DEL PROGRAMA Y RESULTADOS EDUCATIVOS**

### **CARACTERÍSTICA N° 1 Marco del proyecto educativo del programa**

El programa ha definido un proyecto educativo coherente con el proyecto institucional y los campos de acción profesional o disciplinar, en el cual se señalan los objetivos, los lineamientos básicos del currículo, las metas de desarrollo, las políticas y estrategias de planeación y evaluación, y el sistema de aseguramiento de la calidad. Dicho debe ser de conocimiento público e incluir:

### **Estándares básicos**

- 2.1.1 Estrategias y mecanismos establecidos para la discusión, actualización y difusión del Proyecto Educativo del Programa académico
- 2.1.2 Apropiación del Proyecto Educativo del Programa por parte de la comunidad académica del programa.
- 2.1.3 Modelo pedagógico o concepción de aprendizaje que sustentan la metodología de enseñanza en que se ofrece el programa evaluado.
- 2.1.4 Coherencia entre el Proyecto Educativo del Programa y las actividades académicas desarrolladas.
- 2.1.5 El proyecto debe incluir de manera visible los objetivos y principios del modelo de atención primaria en salud, como fundamento de la formación médica.
- 2.1.6 Implementar un plan de estudios y metodologías de enseñanza, práctica, instrucción / aprendizaje que estimulen, preparen y apoyen a los estudiantes para que asuman la responsabilidad de su proceso de aprendizaje.
- 2.1.7 Los métodos de instrucción / aprendizaje abarcarían clases magistrales, enseñanza en grupos pequeños, aprendizaje basado en problemas, basado en casos o evidencias, aprendizaje asistido por pares, prácticas, ejercicios de laboratorio, enseñanza junto a la cama del paciente, demostraciones clínicas, capacitación en laboratorios de habilidades clínicas – escenarios simulados, ejercicios de campo en la comunidad, instrucción apoyada en la web y tecnologías de la información y la comunicación.

### **Estándares de mejoramiento**

- La construcción del proyecto educativo debería ser un proceso participativo, considerando las necesidades y expectativas de diversas partes interesadas, como la sociedad, el sistema de salud, sociedades científicas, organizaciones de pacientes, sector educativo, sector productivo, entre otros.
- El proyecto debería ser susceptible de actualizaciones y mejoras derivadas de cambios actuales y futuros en materia de legislación en educación, salud y trabajo, cambios demográficos, económicos, ambientales y culturales.

## CARACTERÍSTICA N° 2 Resultados educativos del programa

### **Estándares básicos**

El programa debe definir claramente los resultados educativos que sus médicos egresados deben poseer, en relación con:

#### 2.2.1 Identificación, seguimiento y evaluación del desarrollo de competencias:

Conocimientos, actitudes, capacidades y habilidades básicas y particulares para su desempeño como médico general con énfasis en los escenarios de atención primaria en salud y los escenarios complementarios definidos en los modelos de salud del país.

#### 2.2.2 Bases sólidas para su entrenamiento futuro en cualquier especialidad médica o estudios post graduales.

- 2.2.3 Roles y responsabilidades individuales y colectivas en el sector y el sistema de salud, con énfasis en los escenarios de atención primaria en salud y los escenarios complementarios definidos en los modelos de salud del país.
- 2.2.4 Capacidades y compromiso para la actualización, el estudio y el auto aprendizaje continuos.
- 2.2.5 La identificación y búsqueda de la satisfacción de las necesidades de la sociedad y del sistema de salud.
- 2.2.6 Valores y conductas deseables en cuanto al trato, comunicación y respeto para con sus compañeros, colegas, pacientes, familiares, equipos de salud y personal administrativo.
- 2.2.7 Los resultados deben ser dados a conocer y tener evidencia de su grado de cumplimiento.
- 2.2.8 Algunos de los resultados que se espera obtener en los egresados al finalizar el programa, tienen que ver con el conocimiento y comprensión documentados de las ciencias biomédicas básicas, las ciencias del comportamiento y sociales, incluida la salud pública y la atención primaria en salud, ética, derechos humanos y jurisprudencia médica ,ciencias clínicas, incluyendo habilidades clínicas con respecto a procedimientos de diagnóstico, procedimientos prácticos, habilidades de comunicación, tratamiento y prevención de enfermedades, promoción de la salud, rehabilitación, razonamiento clínico y resolución de problemas, la capacidad de emprender un aprendizaje permanente y demostrar profesionalidad en relación con los diferentes roles del médico (WFME 2015).

## **Estándares de mejoramiento**

El programa debería proyectar sus resultados educativos hacia:

- La integración de los resultados de pregrado como punto de partida y bases sólidas sobre las que se estructuren los resultados y procesos formativos de postgrado y educación continuada.
- Reforzar las capacidades, habilidades y conocimientos para el adecuado desempeño de sus estudiantes y egresados en escenarios internacional formativos y laborales, consideración especial al desarrollo de competencias: Conocimientos, capacidades y habilidades comunicativas en u segundo idioma extranjero.
- Fortalecer las capacidades para el aprovechamiento y buen uso de las tecnologías de la información y las tecnologías científicas, en los ámbitos educativos y de la práctica profesional.
- Fomentar la capacidad investigativa permanente de los estudiantes y egresados, de cara a identificar y satisfacer las necesidades de salud de las poblaciones y los sistemas de salud a nivel regional, nacional y mundial.
- Ampliar en estudiantes y egresados la visión de formación y empleo en roles gerenciales, administrativos, educativos, así como, escenarios asistenciales domiciliarios, rurales, empresariales, formativos, entre otros.

CARACTERÍSTICA Nº 3 Método científico

## **Estándares básicos**

El programa debe a través del currículo enseñar:

2.3.1 Los principios del método científico, incluyendo el pensamiento analítico y crítico

2.3.2 Métodos de investigación médica – participación en proyectos de investigación

2.3.3 Principios y metodología de Medicina basada en la evidencia y su aplicación en los escenarios formativos y de desempeño profesional.

### **Estándares de mejoramiento**

- El programa debería incluir elementos de investigación básica y avanzada.

## **CARACTERÍSTICA Nº 4 Ciencias Biomédicas Básicas**

### **Estándares básicos**

El programa debe, identificar e incorporar en el currículo el aporte de las ciencias biomédicas en la comprensión y aplicación en los escenarios formativos y de desempeño profesional, de:

2.4.1 El conocimiento científico fundamental y su aplicación en las ciencias clínicas

2.4.2 Los conceptos y métodos fundamentales y su aplicación en las ciencias clínicas

2.4.3 Las ciencias biomédicas básicas pueden variar dependiendo de necesidades y particularidades del programa y del contexto social o del modelo de atención en salud, pero deben incluir por lo menos: anatomía, bioquímica, biofísica, biología celular, genética, inmunología, microbiología (bacteriología, parasitología y virología), biología molecular, patología, farmacología y fisiología.

## **Estándares de mejoramiento**

- En el currículo se debería revisar ya ajustar el aporte de las ciencias biomédicas de acuerdo con los desarrollos científicos, tecnológicos y clínicos actuales, así como con la capacidad de anticiparse a las necesidades de la sociedad y los sistemas de salud.

CARACTERÍSTICA N° 5 Ciencias sociales y del comportamiento, ética médica, jurisprudencia y administración en salud

## **Estándares básicos**

El programa, en su currículo debe identificar e incorporar la contribución de:

- 2.5.1 Las ciencias sociales y del comportamiento desde el enfoque de determinantes de la salud y la enfermedad, pueden variar de acuerdo con las necesidades, intereses, tradiciones y particularidades sociales, demográficas, económicas, pero se deben considerar entre otras: Bioestadística, medicina comunitaria, epidemiología, problemáticas globales y regionales en salud, higiene, antropología médica aplicada a los ambientes locales, regionales, nacionales y globales, sicología médica, salud pública, medicina social, bases de la medicina tradicional y comunicación.
- 2.5.2 Ética médica: Valores morales, comportamientos adecuados, responsabilidades, derechos y deberes de los pacientes y en la práctica médica, así como la correcta toma de decisiones clínicas.

2.5.3 Jurisprudencia médica: Se ocupa de las leyes y otras reglamentaciones del sistema de salud, de la profesión y la práctica médica, relaciones laborales, contractuales, de manufactura y uso de productos farmacéuticos y tecnologías médicas.

2.5.4 Administración en salud: Conocimientos, conceptos, métodos y habilidades relacionadas con la comprensión y el adecuado desempeño en el sistema y modelo de salud, responsabilidades, interacciones, factores laborales, de remuneración, administración de recursos, sistemas de gestión de calidad en salud, seguridad del paciente, seguridad y salud en el trabajo, manejo de la información y registros clínicos, comercialización de servicios de salud, entre otros.

### **Estándares de mejoramiento**

- El programa debería ajustar y definir en el currículo los conocimientos, contenidos y métodos de acuerdo con los desarrollos científicos y tecnológicos, los cambios en la normatividad y los sistemas de salud, las necesidades actuales y futuras de la sociedad, de las comunidades y de los sistemas de salud, cambios demográficos, ambientales y culturales.

## **CARACTERÍSTICA Nº 6 Ciencias y habilidades clínicas**

### **Estándares básicos**



El programa debe identificar e incorporar en el currículo el aporte de las ciencias clínicas para asegurar que los estudiantes y egresados:

2.6.1 Adquieren los conocimientos y habilidades clínicas y profesionales suficientes y convenientes para asumir de manera apropiada las responsabilidades y desafíos en los escenarios de de práctica profesional y estudios post graduales.

2.6.2 Dedicar suficiente tiempo, esfuerzo y atención durante el programa al contacto planificado, dirigido y controlado con los pacientes en ambientes clínicos relevantes.

2.6.3 Adquieren sensibilidad, conocimientos, habilidades y, apropian metodologías y herramientas que les reviste experiencia en promoción de la salud y medicina preventiva bajo el enfoque de atención primaria en salud.

2.6.4 En el currículo se especifica el tiempo dedicado al entrenamiento en las principales disciplinas clínicas, así como el enfoque para su integración con las ciencias básicas en los escenarios de práctica clínica real o simulada.

2.6.4 Se organiza y desarrolla el entrenamiento y las prácticas clínicas en atención a los programas y lineamientos de seguridad del paciente, así como seguridad y salud en el trabajo para los estudiantes y docentes.

2.6.5 Las ciencias clínicas básicas pueden variar dependiendo de necesidades y particularidades del programa y del contexto social o del modelo de atención en salud, pero deben incluir por lo menos: Anestesia, dermatología, radiología, urgencias, atención pre hospitalaria, prácticas en medicina familiar y medicina general, geriatría, ginecología y obstetricia, medicina interna y sus

subespecialidades , medicina en el laboratorio clínico, tecnología médica, neurología, neurocirugía, oncología, radioterapia, oftalmología, ortopedia, otorrinolaringología, pediatría, cuidado paliativo, fisioterapia y rehabilitación, psiquiatría, cirugía con sus subespecialidades, terapias físicas, respiratoria, ocupacional y del lenguaje, salud sexual y reproductiva; entrenamiento y práctica dirigida en internado.

2.6.6 Las habilidades clínicas deben incluir métodos de anamnesis, toma de antecedentes, examen físico, habilidades de comunicación, procedimientos e investigaciones, prácticas de emergencia y prácticas de prescripción y tratamiento, búsqueda, captura, priorización, organización y registro de información clínica, toma, revisión y replanteamiento de decisiones clínicas.

2.6.7 Las habilidades profesionales deben incluir el trato con los pacientes, liderazgo, trabajo en equipo, trabajo bajo presión, capacitación interprofesional, disertación, síntesis y estructuras mentales y procedimentales para la toma de decisiones.

### **Estándares de mejoramiento**

- En el currículo se debería revisar ya ajustar el aporte de las ciencias clínicas de acuerdo con los desarrollos científicos, tecnológicos y clínicos actuales, así como con la capacidad de anticiparse a las necesidades de la sociedad y los sistemas de salud.
- Asegurar que todos los estudiantes tienen un contacto controlado, dirigido y temprano con el paciente y las actividades relacionadas con su cuidado en salud.

- Estructurar y articular las diferentes etapas del entrenamiento clínico de acuerdo con las fases del programa de estudios.

## CARACTERÍSTICA Nº 7 Principios y bases de la atención primaria en salud

### **Estándares básicos**

El programa debe, identificar e incorporar en el currículo contenidos relativos a la atención primaria en salud como fundamento para la educación y formación médica, y de esta manera asegurar que los estudiantes y egresados:

- 2.7.1 Adquieren los conocimientos y habilidades clínicas y profesionales suficientes y convenientes para asumir de manera apropiada las responsabilidades y desafíos en los escenarios de práctica profesional y estudios post graduales, al tenor de las necesidades del modelo de salud de nuestro país, las tendencias locales, regionales y mundiales en cuidado de la salud y prevención de la enfermedad.
- 2.7.2 Dedicar suficiente tiempo, esfuerzo y atención durante el programa a la identificación e intervención del riesgo en salud, la promoción de la salud y prevención de la enfermedad con orientación familiar y comunitaria, en ambientes clínicos intra y extrainstitucionales (IPSs de primer a cuarto nivel de complejidad, guarderías infantiles, ancianatos, prácticas comunitarias, entre otros).

- 2.7.3 Adquieren sensibilidad, conocimientos, habilidades y, apropian metodologías y herramientas para la identificación e intervención de determinantes en salud de orden no biológico, social, económico, nutricional, psicológico, comportamental, considerando la diversidad cultural, étnica y territorial.
- 2.7.4 Cuentan con sitios de práctica donde se ha implementado el enfoque de atención primaria en salud dentro de sus modelos de atención, garantizando adecuadas condiciones de acceso y suficiencia para que docentes y estudiantes participen de los cuidados de salud de los pacientes dentro de las actividades formativas sin interferir con las actividades asistenciales y administrativas de los hospitales universitarios y/o sitios de práctica.
- 2.7.5 Los docentes han recibido capacitación y entrenamiento continuos sobre la estrategia de atención primaria en salud.
- 2.7.6 En el currículo se especifica el tiempo dedicado al entrenamiento en los principales contenidos del modelo e atención primaria, así como, las metodologías para integrar las actividades de formación en medicina con las de otras ramas de la salud, de manera que desde la fase formativa se promueva el abordaje integral y continuo del paciente, sus determinantes de salud y enfermedad, guardando un adecuado equilibrio entre los aspectos individuales y colectivos, y entre los curativos y preventivos, en coherencia con los contenidos impartidos desde las ciencias básicas y clínicas.
- 2.7.7 Los contenidos pueden variar dependiendo de las necesidades y particularidades del programa, del contexto social o del modelo de atención en salud, pero deben

incluir por lo menos: Procesos morfo-funcionales propios de los seres humanos (gestación, crecimiento, desarrollo, envejecimiento y muerte), determinantes biológicos, ambientales, socio-culturales, psicológicos, éticos y legales, a nivel individual y colectivo del proceso salud-enfermedad, el proceso de salud enfermedad en la población en sus aspectos determinantes, en su ocurrencia y las acciones de intervención, elaboración diagnóstica, diagnóstico diferencial, propuesta y conducta terapéutica, pronóstico y evolución de las enfermedades en todas las etapas del ciclo biológico, considerando criterios de prevalencia y potencial mórbido, diagnóstico temprano, recuperación y rehabilitación, promoción de la salud y de estilos de vida saludables, aspectos ligados al reconocimiento y respeto a la diversidad de costumbres, etnias, ideas y saberes sobre el proceso salud-enfermedad,, finalmente, en el internado un ciclo de actividades comunitarias, de APS, o de salud familiar.

2.7.8 Para las habilidades clínicas y profesionales, aplican las descritas para las ciencias clínicas, con especial atención a su comprensión y aplicación en el contexto de la atención primaria en salud.

### **Estándares de mejoramiento**

Se deberían enfocar esfuerzos desde el programa, para desarrollar acciones específicas en el contexto de la atención primaria en salud con miras a:

- Desarrollar trabajos conjuntos entre el programa, comunidad e instituciones sanitarias como apoyo a programas, políticas y planes de salud locales regionales y nacionales.

- Participar activamente en la formulación, revisión y actualización de guías, protocolos y modelos de atención con las asociaciones científicas, entes gubernamentales, grupos de pacientes, instituciones del sector salud y otras partes interesadas.
- Desde su presencia en los sitios de práctica, espacios académicos y de investigación, aportar a la difusión y apropiación del modelo de atención primaria en salud por parte de los diferentes actores del sistema de salud, comunidades, sector productivo y gubernamental.
- Revisar y ajustar en el currículo el aporte de la atención primaria en salud de acuerdo con los desarrollos científicos, tecnológicos y clínicos actuales, así como con la capacidad de anticiparse a las necesidades de la sociedad y los sistemas de salud.

CARACTERÍSTICA N° 8 Estructura, composición, autorregulación y duración del programa

### **Estándares básicos**

2.8.1 El programa debe describir el contenido, extensión y secuencia de cursos, rotaciones, prácticas y otros elementos curriculares de manera que se asegure la adecuada coherencia entre las ciencias biomédicas básicas, ciencias clínicas, ciencias sociales, del comportamiento y el enfoque de atención primaria en salud.

2.8.2 El programa debe contar con un comité curricular bajo el liderazgo de de la dirección del programa o de la facultad, que tenga la responsabilidad de planear e implementar el plan de estudios.

2.8.3 Correlación entre la duración prevista para el programa, de acuerdo con su metodología y plan de estudios, y la que realmente tiene lugar.

### **Estándares de mejoramiento**

El programa debería, por medio de su currículo:

- Asegurar la integración horizontal de ciencias, disciplinas y asignaturas comunes.
- Asegurar la integración vertical de las ciencias clínicas con las ciencias básicas, ciencias sociales, del comportamiento, el enfoque de atención primaria en salud, medicinas alternativas o tradicionales.
- Permitir contenido opcional o electivo, y definir el equilibrio entre el núcleo y el contenido opcional como parte del programa educativo.
- Desde el comité curricular implementar actualizaciones curriculares y crear espacios participativos con entes gubernamentales, comunidad, instituciones sanitarias y el sector productivo.
- Mantener actualizado el currículo con base en los cambios y necesidades del entorno laboral, social y de educación post gradual en el que se desempeñarán los futuros médicos, considerando aspectos laborales, económicos, científicos, tecnológicos, de los sistemas de salud y las sociedades, entre otros.

- Existencia y aplicación de políticas institucionales en materia de referentes académicos externos, nacionales e internacionales para la revisión y actualización del plan de estudio.

## CARACTERÍSTICA Nº 9 Flexibilidad curricular

### **Estándares básicos**

El programa, por medio de su currículo debe demostrar:

2.9.1 Existencia y aplicación de políticas institucionales en materia de flexibilidad, referidas

a la organización y jerarquización de los contenidos, reconocimiento de créditos, formación en competencias tales como actitudes, conocimientos, capacidades, y habilidades, y estrategias pedagógicas, electividad, doble titulación y movilidad.

2.9.2 Existencia y aplicación de políticas y normas para asegurar la continuidad y movilidad

del estudiante en el sistema educativo y en la institución: homologaciones de créditos,

reconocimientos de experiencias educativas y laborales previas, equivalencia de títulos y transferencias.

2.9.3 Movilidad estudiantil con otras instituciones nacionales e internacionales.



2.9.4 Existencia de sistemas de homologación de créditos y de tránsito del pregrado al postgrado.

2.9.5 Convenios y relaciones de cooperación con instituciones de educación media y superior y con el sector laboral, para asegurar el tránsito y continuidad de los estudiantes en el sistema educativo y su inserción en el sistema productivo, de acuerdo con el tipo y modalidad del programa.

### **Estándares de mejoramiento**

A partir de la gestión del currículo el programa debería promover:

- Mecanismos que permitan el tratamiento de problemas pertinentes al programa y al ejercicio laboral, a través de orientaciones interdisciplinarias por parte de profesores y estudiantes.
- Reconocer y promover la interdisciplinariedad y estimular la interacción de estudiantes y profesores de distintos programas y de otras áreas de conocimiento.

CARACTERÍSTICA Nº 10 Sistema de evaluación a estudiantes

## **Estándares básicos**

El programa debe demostrar que su sistema de evaluación de estudiantes cumple con:

2.10.1 Definir y publicar criterios, políticas y reglamentaciones institucionales y del programa en materia de evaluación académica de los estudiantes.

2.10.2 El sistema debe permitir la identificación de las competencias, especialmente las destrezas, actitudes, los conocimientos, las capacidades, las habilidades, el núcleo curricular y las capacidades investigativas adquiridas de acuerdo con el plan curricular.

2.10.3 Correspondencia entre las formas de evaluación de los aprendizajes, los propósitos de formación y los perfiles de egreso definidos por el programa, garantizando que los métodos y resultados son objetivos y libres de conflictos de interés.

2.10.4 Criterios y procedimientos para la revisión de los sistemas de evaluación académica de los estudiantes, como permitir que las evaluaciones estén abiertas al escrutinio de expertos técnicos y utilizar un sistema de apelación de los resultados de evaluación.

2.10.5 Los métodos de evaluación utilizados deben considerar el equilibrio entre la evaluación formativa y la sumativa, el número de exámenes y otras pruebas, el equilibrio entre los diferentes tipos de exámenes (escritos y orales), el uso de criterios normativos y criterios de referencia, y el uso de tipos especiales de exámenes, por ej. exámenes clínicos estructurados objetivos (OSCE) y mini

ejercicio de evaluación clínica (MiniCEX). También incluiría sistemas para detectar y prevenir el plagio.

2.10.6 Garantizar que los estudiantes logren los resultados educativos previstos, así como motivar en ellos el aprendizaje.

2.10.7 Proporcionar un equilibrio apropiado entre la evaluación formativa y la sumativa para desde estos resultados guiar el aprendizaje y las decisiones sobre el progreso académico.

2.10.8 Garantizar la retroalimentación oportuna, específica, constructiva y justa a los estudiantes sobre la base de los resultados de la evaluación.

### **Estándares de mejoramiento**

El modelo evaluativo debería propender por:

- Evaluar y documentar la confiabilidad y validez de los métodos de evaluación.
- Considerar la evaluación por examinadores externos en casos puntuales para mejorar la confiabilidad, calidad y transparencia.
- Implementar mecanismos de certificación y recertificación de los profesionales de salud en APS; exámenes a graduados y alumnos como otras formas de evaluación y acreditación posible o conveniente.

### **CARACTERÍSTICA Nº 11 Extensión o proyección social**

El programa debe ejercer un impacto positivo en el ámbito local regional y nacional de salud, en respuesta a necesidades de la sociedad y del sistema de salud, en desarrollo de políticas sociales y de salubridad definidas, ello se logra a partir de:

2.11.1 El programa ha definido mecanismos para enfrentar académicamente problemas y oportunidades del entorno, para evaluar su pertinencia, promover el vínculo con los distintos sectores de la sociedad, el sector productivo, el Sistema de salud y el Sistema Nacional de Formación para el Trabajo.

2.11.2 Existencia y aplicación de criterios y políticas institucionales y del programa en materia de extensión o proyección social.

2.11.3 Proyectos y actividades de extensión o proyección a la comunidad desarrollados por directivos, profesores y estudiantes del programa.

2.11.4 Evidencias del impacto en el entorno que han generado los resultados de los proyectos de extensión o proyección social desarrollados por el programa.

2.11.5 Participación del programa en la aplicación las políticas nacionales en materia de innovación y desarrollo en salud, económico, técnico y tecnológico.

### **Estándares de mejoramiento**

- El programa debería considerar la apreciación de empresarios, funcionarios públicos, líderes comunitarios y de otros agentes externos sobre el impacto social de los proyectos desarrollados por el programa.
- Los logros en esta materia deberían ser tenidos en cuenta como aporte para la definición, implementación, seguimiento y mejora del modelo de atención primaria en salud, buscando mejorar la interrelación y el impacto entre la academia, la sociedad y el sistema sanitario.

## **FACTOR 3 ESTUDIANTES**

### **CARACTERÍSTICA N° 1 Política de selección e ingreso**

#### **Estándares básicos**

El programa debe:

- 3.1.1 Formular e implementar una política de admisión basada en principios de objetividad, incluyendo claramente los parámetros de selección de estudiantes que se deben basar principalmente en méritos y capacidades intelectuales.
- 3.1.2 Dar a conocer de manera pública la política de admisión, selección e ingreso.
- 3.1.3 Contar con una política implementada para la admisión de estudiantes discapacitados o con condiciones económicas o sociales especiales.
- 3.1.4 Contar con una política implementada para la transferencia de estudiantes de otros países, programas o universidades internacionales, así como para homologaciones o nivelaciones desde otros programas, niveles o ciclos educativos.
- 3.1.5 Los parámetros de selección de los estudiantes deben comprender entre otros, los resultados de la escuela secundaria, otras experiencias académicas o educativas relevantes, los exámenes de ingreso y las entrevistas, incluida la

evaluación de la motivación para convertirse en médicos, así como, la valoración de las potencialidades humanas para el desarrollo y perfeccionamiento de las competencias básicas y específicas. La selección también tomaría en cuenta la necesidad de variaciones relacionadas con la diversidad de la práctica médica

### **Estándares de mejoramiento**

Los procesos de selección e ingreso deberían mejorar a partir de:

- La consideración y ajuste de la relación entre la selección y la misión de la escuela, el programa educativo y las cualidades deseadas de los graduados
- El uso de un sistema para la apelación de decisiones relativas a la admisión y selección.
- Revisar periódicamente que la política de admisión se base en datos sociales y profesionales relevantes, para cumplir con las necesidades de salud de la comunidad y la sociedad, e incluya parámetros de selección e ingreso según el género, la etnia y otros requisitos sociales (características socioculturales y lingüísticas de la población), incluida la posible necesidad de una política especial de reclutamiento, admisión e inducción para estudiantes y minorías desfavorecidos.

### **CARACTERÍSTICA Nº 2 Admisión de estudiantes y capacidad institucional**

#### **Estándares básicos**

El programa debe:

- 3.2.1 Determinar el número de estudiantes susceptibles de ser admitidos en el programa, de acuerdo con las capacidades y recursos necesarios en todas las etapas del programa para garantizar que estos estudiantes puedan adelantar sus estudios hasta su culminación.
- 3.2.2 Evidenciar la utilización de los escenarios de práctica requeridos para cumplir con los objetivos del programa, que cuenten con la capacidad técnica y logística para garantizar el adecuado desarrollo de los procesos de aprendizaje durante las diferentes etapas del programa.
- 3.2.3 Evidenciar que los convenios de docencia – servicio se realizan a largo plazo y con IPSs acreditadas o con Hospitales Universitarios, y en ellos la dinámica interinstitucional denota equilibrio y reciprocidad, asó como mecanismos y escenarios participativos para la construcción, seguimiento y mejoramiento de los procesos y actividades del convenio.
- 3.2.4 Evidenciar que la relación entre el número de estudiantes y la capacidad instalada de los escenarios de práctica (camas, docentes, tutores, investigadores, salones, tecnología, entre otros) es adecuada y suficiente para el desarrollo de las actividades de formativas sin afectar la prestación de los servicios asistenciales de la institución, la seguridad y respeto a los pacientes.
- 3.2.5 Contar con espacios formativos y de práctica que favorezcan adecuados procesos de enseñanza y aprendizaje del modelo de atención primaria en salud, como eje fundamental de la formación médica.

3.2.6 Los profesores-médicos que tienen a cargo los programas de docencia de servicio cuentan con el nivel de formación adecuado y la experiencia requerida en los aspectos disciplinares y educativos.

### **Estándares de mejoramiento**

- El programa debería revisar constantemente el número y naturaleza de los estudiantes admitidos frente a las necesidades de diversas partes interesadas (sistema de salud, asociaciones científicas, organismos del sector educativo, laboral y sanitario, entre otras
- Deberían considerarse ajustes a las políticas de admisión en respuesta a los cambios y las necesidades de la población como género, etnicidad, características socio culturales y lingüísticas, distribución geográfica de las poblaciones y de la fuerza laboral, oferta y demanda laboral, patrones migratorios, etc.

CARACTERÍSTICA N° 3 Participación en actividades de formación integral - enfoque en atención primaria en salud

### **Estándares básicos**

El programa debe:

3.3.1 Promover la participación de los estudiantes en actividades investigativas, académicas, proyectos de desarrollo empresarial, proyectos comunitarios, tecnológicos y de innovación, en el marco de los ambientes formativos y la formación integral.



3.3.2 Fomentar el enfoque disciplinar y laboral orientado a la prestación de atención médica integral al ser humano, en su entorno familiar y social, mediante acciones de promoción, prevención, diagnóstico, tratamiento y rehabilitación, con un enfoque bio-psicosocial ambientalista, con la Atención Primaria de Salud como estrategia y eje transversal de su formación.

3.3.3 Reforzar en sus estudiantes y egresados a partir de los lineamientos de atención primaria en salud la capacidad de:

- Adecuar su práctica profesional a la definición del sistema de salud de su país y de acuerdo al contexto donde trabaja para prevenir y resolver problemas de salud
- Establecer relaciones de respeto y confianza para dialogar y negociar con los ciudadanos/comunidad, equipos/comunidades y otros sectores, respetando la diversidad cultural.
- Trabajar en equipo y desarrollar liderazgo con el resto del equipo de salud y la comunidad
- Incorporar en sus procesos de aprendizaje y proyectar en el escenario laboral, elementos de educación multicultural, uso de tecnologías, pensamiento crítico y capacidad de aprendizaje continuo, motivación para investigar e innovar, y objetivos de servicio a la comunidad.
- Contribuir a la conservación de la vida y del medio ambiente en el ámbito de la salud promoviendo estilos de vida saludables.

- Reconocer y respetar la diversidad de costumbres, etnias, creencias e ideas de las personas.
- Diagnosticar y tratar correctamente las enfermedades del ser humano en todas las fases de su desarrollo, teniendo en cuenta criterios de prevalencia y potencial mórbido.
- Abordar los múltiples aspectos de la relación médico-paciente, desarrollando la capacidad, sensibilidad y pertinencia en la relación con el paciente, sus familiares y el equipo de salud.
- Aplicar los principios básicos de administración y gestión de programas de salud.
- Emplear el razonamiento crítico en la interpretación de la información, en la identificación del origen y resolución de los problemas de la práctica médica, mediante la utilización de la metodología científica en la práctica profesional.
- Abordar críticamente la dinámica del mercado de trabajo, y para aplicar las políticas, y la legislación vigente en materia de salud, tanto en materia de salud pública como del ejercicio profesional.
- Evaluar y conocer la realidad sanitaria de su medio y adecuar sus acciones a la misma, gestionando con el paciente las soluciones a los problemas planteados.
- Capacidad para identificar e intervenir sobre los diferentes factores que integran la problemática del fenómeno salud-enfermedad (biológicos, psicológicos, sociales y económicos).

- Considerar las relaciones de riesgo-beneficio y costo-beneficio en las decisiones respecto a todos los procedimientos médicos a prescribirse, tanto de diagnóstico, tratamiento y rehabilitación; basándose en evidencias científicas comprobables.
- Comunicación con el paciente, la familia y la comunidad. Ser capaz de establecer comunicación verbal, no verbal y escrita con los pacientes, familiares, comunidad y el equipo de salud; y ser capaz de desarrollar actividades educativas en el ámbito que le corresponda desempeñarse.
- Integrar el pensamiento crítico y la capacidad de ejecutar o participar en proyectos de investigación, y de continuar y actualizar permanentemente su formación a través de postgrados o formación continua.
- Interiorizar e implementar prácticas y actitudes que procuren su propia salud física y mental y la de sus pacientes y compañeros en ambientes y programas de seguridad del paciente al interior de los servicios sanitarios.

### **Estándares de mejoramiento**

- El programa debería abrir canales de comunicación y trabajo permanentes con sectores de la comunidad, entidades gubernamentales y del sector sanitario para el desarrollo y fomento de la estrategia de atención primaria en salud.
- El programa debería ser participe activo en comunidades nacionales e internacionales de reconocido liderazgo, con el desarrollo de trabajos de investigación, proyectos o actividades docente asistenciales con impacto y aplicabilidad en los contextos sociales y académicos nacionales e internacionales.

## CARACTERÍSTICA N° 4 Reglamentos estudiantil, académico y asesoría estudiantil

### **Estándares básicos**

El programa debe:

- 3.4.1 Define, aplica y divulga adecuadamente los reglamentos estudiantil y académico, oficialmente aprobados.
- 3.4.2 En los reglamentos estudiantil y académico definir entre otros aspectos, los deberes y derechos, el régimen disciplinario, el régimen de participación en los organismos de dirección y las condiciones y exigencias académicas de permanencia y graduación
- 3.4.3 Se cuenta con un sistema para el asesoramiento académico de su población estudiantil.

### **Estándares de mejoramiento**

- Considerar políticas y estrategias sobre estímulos académicos para los estudiantes.
- Fomentar el apoyo estudiantil que atienda las necesidades sociales, financieras y personales
- Proveer asesoramiento académico basado en el monitoreo del progreso académico de los estudiantes e incluir orientación y planificación personal y profesional.

## CARACTERÍSTICA N° 5 Impacto de los egresados en el medio

### **Estándares básicos**

El programa debe contar con mecanismos para determinar, realizar seguimiento y mejora continua a:

- 3.5.1 Mecanismos de monitoreo de los procesos académicos: tasas de retención, de aprobación, de titulación, tiempo de egreso.
- 3.5.2 Capacidad de absorción de los graduados por parte del sistema de salud, público y privado, e incorporación de los mismos a actividades académicas y de la comunidad científica.
- 3.5.3 Influencia de los graduados en la generación de mejoras en el sistema de salud.
- 3.5.4 Relación y pertinencia de los programas de investigación y de extensión con la problemática del entorno.

### **Estándares de mejoramiento**

- Los resultados de la evaluación del impacto deberían ser considerados para la revisión curricular, junto con las necesidades de las diferentes partes interesadas tanto internas como externas.
- Incentivar la creación de escenarios comunes con sectores científicos, sociales, productivos y estatales, desde los cuales se promueva la definición e

implementación de programas y acciones encaminadas a impactar positivamente las problemáticas en salud de la población.

## **FACTOR 4 PERSONAL ACADÉMICO - DOCENTES**

CARACTERÍSTICA Nº 1 Política de selección, vinculación y permanencia

### **Estándares básicos**

El programa debe definir e implementar una política de selección, vinculación y permanencia, la cual:

- 4.1.1 Determine de manera transparente y pública los lineamientos sobre el tipo, el número y la distribución del personal y sus responsabilidades para el correcto desarrollo del currículo en sus diferentes fases, incluyendo la relación entre personal médico y no médico, cargos de tiempo completo y medio tiempo, y entre personal académico y no académico; prestando especial atención, en contar dentro de los perfiles médicos con investigadores de alta calidad y profesionales entrenados y actualizados en el modelo de atención básica primaria, extensión y proyección social.
- 4.1.2 Defina los criterios a tener en cuenta para los perfiles y competencias según el cargo a ocupar en el programa, basado en el mérito educativo, científico y clínico, la experiencia laboral y docente, incluyendo la relación entre enseñanza, investigación y actividades administrativas; dichos criterios pueden corresponder

a títulos y calificaciones formales, experiencia profesional, trabajos de investigación, reconocimientos científicos y educativos, certificados de pares.

4.1.3 Incluya acciones de seguimiento a las responsabilidades definidas para el personal académico en las diferentes áreas del conocimiento del programa.

4.1.4 Estrategias de la Institución para propiciar la permanencia de los profesores en el programa y el relevo generacional.

4.1.5 La institución aplica en forma transparente y equitativa un estatuto profesoral inspirado en una cultura académica universalmente reconocida, que contiene, entre otros, los siguientes aspectos: Régimen de selección, vinculación, promoción, escalafón docente, retiro y demás situaciones administrativas; derechos, deberes, régimen de participación en los organismos de dirección, régimen disciplinario, distinciones y estímulos.

### **Estándares de mejoramiento**

En la definición y ajuste de la política se debería considerar:

- La relación entre la misión, visión, objetivos del programa
- Factores económicos y del mercado laboral

CARACTERÍSTICA N° 2 Actividades, responsabilidades y desarrollo del personal académico - docentes

### **Estándares básicos**

El programa debe determinar lineamientos claros, los cuales permitan:

- 4.2.1 Un adecuado balance entre las capacidades y responsabilidades docentes, investigativas y administrativas dentro del programa, prestando especial atención a la proporción docente/alumno para el adecuado desarrollo de los diferentes componentes curriculares.
- 4.2.2 Asegurar que los docentes cuentan con los méritos académicos definidos, principalmente en los campos de la docencia, investigación, enfoque de servicio y trabajo comunitario.
- 4.2.3 Asegurar que, en los sitios de práctica clínica y servicios externos, se cuente con supervisores y/o docentes propios para el curso o actividad con la disponibilidad e idoneidad requerida, evitando que estas labores recaigan sobre el personal asistencial del centro de práctica.
- 4.2.4 Desarrollar programas de capacitación específicos sobre la estrategia de Atención Primaria de la Salud a docentes y personal de apoyo.
- 4.2.5 Considerar como parte de la calidad de la formación, las condiciones dignas de trabajo de los profesionales docentes de acuerdo con sus méritos académicos y profesionales.
- 4.2.6 Asegurar que las actividades de investigación y asistenciales sean usadas dentro de los procesos de enseñanza y aprendizaje.
- 4.2.7 Incluir actividades de entrenamiento, desarrollo, promoción, apoyo y evaluación en las competencias disciplinares y educativas definidas: Conocimientos, actitudes,



habilidades, capacidades y destrezas. Esto debe aplicar para todo el personal docente nuevo, antiguo, de áreas básicas, clínicas y sitios de práctica

4.2.8 Garantizar que los docentes dediquen tiempo y esfuerzo a labores de tutoría, acompañamiento de estudiante y el desarrollo de competencias, especialmente actitudes, conocimientos, capacidades y habilidades.

4.2.9 Incentivar en los estudiantes la generación de ideas y problemas de investigación, la identificación de problemas en el ámbito de la salud, susceptibles de resolver mediante la aplicación del conocimiento y la innovación.

### **Estándares de mejoramiento**

El programa debería:

- Desarrollar e implementar una política de promoción del personal, premios, reconocimientos, remuneración diferencial de acuerdo con los logros en materia de investigación, proyección social, cooperación internacional, docencia y dedicación a la atención primaria en salud como eje formativo.
- Mantener actualizadas las políticas de acuerdo con los cambios que se presenten en los campos laborales, educativos, de salud, necesidades de la población y el sistema de salud.
- Promover la participación de los profesores en los órganos de dirección del programa, de la facultad, del departamento y/o de la institución
- Fomentar el conocimiento y uso de las tecnologías de información y la comunicación dentro de los procesos formativos.

- Incentivar en los docentes la capacidad de identificar, intervenir y desarrollar en los estudiantes, las necesidades individuales en materia formativa, dentro de los parámetros y objetivos educativos del programa.
- Considerar en los procesos evaluativos su contribución al logro de los objetivos institucionales, las metas institucionales y del programa.
- Definir e implementar mecanismos de evaluación por pares.

CARACTERÍSTICA N° 3 Producción, pertinencia, utilización e impacto de material docente

### **Estándares básicos**

El programa debe prestar especial atención a:

- 4.3.1 Promover y controlar la producción de materiales para el desarrollo de las diversas actividades docentes, garantizar su utilización eficiente y la evaluación periódicamente con base en criterios y mecanismos académicos previamente definidos.
- 4.3.2 El programa debe contar con la existencia y aplicación de un régimen de propiedad intelectual en la institución.

### **Estándares de mejoramiento**

- El programa debería, a partir de la producción del material docente, incentivar el trabajo conjunto entre las diferentes áreas curriculares, otros programas de la

salud, otras áreas del conocimiento; y proyectar el material escenarios externos del sector educativo, científico, laboral, social y salud.

## **FACTOR 5 RECURSOS EDUCATIVOS**

### **CARACTERÍSTICA N° 1 Infraestructura y recursos físicos**

#### **Estándares básicos**

El programa debe:

- 5.1.1 Asegurar que, tanto en las instalaciones principales como en los centros de práctica y sitios externos, se cuente con los recursos físicos suficientes y convenientes para el personal docente y estudiantes, de manera que el currículo se pueda desarrollar adecuadamente; dichos recursos pueden incluir entre otros: Salas de lectura, salones para clases, laboratorios de enseñanza e investigación, laboratorios de simulación, oficinas, bibliotecas, salas de informática, comodidades para los estudiantes como espacios de estudio, facilidades de transporte, alimentación, alojamiento, casilleros, escenarios deportivos y de recreación.

5.1.2 Asegurar un ambiente físico seguro para docentes, estudiantes, pacientes y familias, en atención a programas de seguridad del paciente y al sistema de seguridad y salud en el trabajo.

### **Estándares de mejoramiento**

- El programa debería mejorar continuamente la infraestructura física mediante remodelación, mantenimiento, ampliación o adecuación de acuerdo con nuevas necesidades del programa, cambios o avances en las prácticas educativas y científicas.

### **CARACTERÍSTICA N° 2 Recursos para entrenamiento clínico**

#### **Estándares básicos**

El programa debe asegurar que cuenta con los recursos necesarios para que los estudiantes adquieran la experiencia clínica en cada componente del currículo y de acuerdo con los objetivos del programa, incluyendo:

5.2.1 Escenarios de práctica y convenios docente-asistenciales de largo plazo, con Hospitales Universitarios y/o IPSs acreditadas certificados por el Ministerio de Protección Social, de acuerdo con la oferta del programa: Hospitales y servicios ambulatorios de todos los niveles de complejidad con acceso a las diferentes prácticas de nivel primario y secundario con subespecialidades, servicios de apoyo diagnóstico como laboratorios clínicos, centros de imagenología, servicios ambulatorios como consultorios, centros de atención primaria, centros de cuidado

comunitario, servicios de transporte asistencial, servicios de salud rurales, servicios de atención domiciliaria o extensión hospitalaria, hospitales día, unidades psiquiátricas, centros deportivos y de rehabilitación, entre otros.

5.2.2 Se debe garantizar su pertinencia, calidad docente y capacidad instalada en relación con el número de estudiantes del programa y docentes que están en capacidad de albergar.

5.2.3 Práctica clínica supervisada con la adecuada cantidad y complejidad de pacientes; lo cual se puede complementar, pero no reemplazar con modelos simulados, técnicas de realidad virtual, tele-medicina, entre otras.

5.2.4 Se deben determinar junto con el centro de práctica, las funciones, alcances deberes y responsabilidades que deben cumplir los docentes y estudiantes en el marco de las políticas de salud y de las necesidades de salud particulares de su área geografía y sus perfiles de salud.

### **Estándares de mejoramiento**

- El programa debería ampliar la oferta, complejidad y diversidad de sitios de práctica y entrenamiento clínico para adecuarse a los cambios en materia de salud como: Nuevos desarrollos tecnológicos, necesidades de la población, avances en los sistemas, servicios y modelos de salud, necesidades del sector productivo y laboral.
- El programa debería incentivar y facilitar la movilidad estudiantil y docente entre universidades y sitios de práctica, mediante convenios activos y actividades de

cooperación académica desarrollados por el programa con instituciones y programas de alta calidad y reconocimiento nacional e internacional.

## CARACTERÍSTICA Nº 3 Tecnologías de la información

### **Estándares básicos**

El programa debe:

- 5.3.1 Definir e implementar una política para regular el acceso y uso adecuado de las tecnologías informáticas y de comunicación bajo parámetros controlados de seguridad y ética; dichas tecnologías incluyen computadores, teléfonos celulares, acceso a redes de internet internas y externas, bibliotecas en línea, plataformas de E learning, entre otras.
- 5.3.2 Las tecnologías de la información y la comunicación deben ser usadas en beneficio de los procesos de enseñanza y aprendizaje, diseño y producción de contenidos, implementación de estrategias pedagógicas, apoyo y seguimiento a las actividades académicas de los estudiantes, atención de pacientes, como para el entrenamiento de los estudiantes en búsquedas de información y medicina basada en la evidencia, para brindar orientación sobre educación continua, prácticas de telemedicina y entrenamiento en nuevas tecnologías científicas.
- 5.3.3 Garantizar adecuadas condiciones de disponibilidad, capacidad, funcionamiento, seguridad y confidencialidad en el uso y administración de los recursos

tecnológicos y de la información, con especial atención a los registros clínicos e información personal de los pacientes de acuerdo con la normatividad vigente.

## CARACTERÍSTICA N° 4 Recursos bibliográficos

### **Estándares básicos**

El programa debe contar con:

- 5.4.1 Recursos bibliográficos adecuados y suficientes en cantidad y calidad, actualizados y accesibles a los miembros de la comunidad académica, y promueve el contacto del estudiante con los textos y materiales fundamentales y con aquellos que recogen los desarrollos más recientes.
- 5.4.2 Lineamientos definidos e implementados en materia de acceso, adquisición y actualización de material bibliográfico, como revistas especializadas, bases de datos y suscripciones a publicaciones periódicas, relacionados con el programa.

### **Estándares de mejoramiento**

El programa debería:

- Incentivar y promover en estudiantes y docentes el uso de las nuevas tecnologías de la información y la comunicación en los procesos académicos.

## CARACTERÍSTICA N° 5 Recursos Financieros

## **Estándares básicos**

El programa debe disponer de:

- 5.5.1 Recursos presupuestales suficientes para funcionamiento e inversión, de acuerdo con su naturaleza y objetivos.
- 5.5.2 Mecanismos de seguimiento y verificación a la ejecución presupuestal del programa con base en planes de mejoramiento y mantenimiento.
- 5.5.3 Lineamientos definidos e implementados para garantizar las dinámicas de administración compartida entre las Institución de Educación Superior y el Hospital Universitario o la IPS, en cuanto a convenios docentes-asistenciales y escenarios de prácticas, entre otros

## **Estándares de mejoramiento**

El programa debería:

- Optimizar su capacidad para generar recursos externos para el apoyo a sus funciones misionales.
- Gestionar fuentes de ingresos alternas como apoyo del sector productivo, estatal, organizaciones internacionales, fundaciones privadas, aportes de egresados, entre otras.
- A partir de un estudio de viabilidad financiera, definir un plan de inversión con el fin de garantizar los recursos necesarios para actividades de docencia, investigación, proyección social, bienestar institucional e internacionalización que en forma directa o indirecta se reflejen en el programa.



## **FACTOR 6 BIENESTAR INSTITUCIONAL**

### **CARACTERÍSTICA N° 1 Políticas, programas y servicios de bienestar universitario**

#### **Estándares básicos**

El programa debe contar con:

- 6.1.1 Políticas sobre bienestar institucional suficientemente conocidas que propician el desarrollo integral de la comunidad institucional, reconozcan el valor y la diversidad y orientan la prestación de los servicios de bienestar.
- 6.1.2 Servicios de bienestar universitario suficientes, adecuados y accesibles, utilizados por profesores, estudiantes y personal administrativo del programa.
- 6.1.3 Estrategias que permitan a los estudiantes vincularse a redes de apoyo orientadas a contrarrestar las situaciones de vulnerabilidad.
- 6.1.4 Recursos adecuados, suficientes y accesibles en los sitios de práctica clínica para estudiantes y docentes, como lockers, camarotes, dormitorios, sitios de alimentación, parqueo, entre otros.

#### **Estándares de mejoramiento**

El programa debería promover:

- Estrategias de seguimiento integral a la comunidad institucional y acciones derivadas que conduzcan al desarrollo humano y el respeto a la diferencia.

- La investigación permanente de la problemática social del entorno que incide en la comunidad institucional.

## CARACTERÍSTICA N° 2. Permanencia y retención estudiantil

### **Estándares básicos**

El programa debe definir e implementar:

6.2.1 Sistemas de evaluación y seguimiento a la permanencia y retención y tiene mecanismos para su control sin detrimento de la calidad. El tiempo promedio de permanencia de los estudiantes en el programa es concordante con la calidad que se propone alcanzar y con la eficacia y eficiencia institucionales.

6.22 Registros periódicos de la caracterización de los estudiantes teniendo en cuenta variables de vulnerabilidad.

### **Estándares de mejoramiento**

- Existencia de proyectos que establezcan estrategias pedagógicas y actividades extracurriculares orientadas a optimizar las tasas de retención y de graduación de estudiantes en los tiempos previstos, manteniendo la calidad académica del programa.

## **FACTOR 7 ORGANIZACIÓN, ADMINISTRACIÓN Y GESTIÓN**

## CARACTERÍSTICA N° 1 Organización, administración y gestión del programa

### **Estándares básicos**

El programa cuenta con procesos de organización y gestión administrativa que permiten:

7.1.1 El desarrollo y la articulación de las funciones de docencia, investigación, práctica clínica, extensión o proyección social y la cooperación internacional.

7.1.2 Las personas encargadas de la administración del programa son suficientes en número y dedicación, poseen la idoneidad requerida para el desempeño de sus funciones y entienden su vocación de servicio al desarrollo de las funciones misionales del programa.

7.1.3 Definir los criterios institucionales para la toma de decisiones sobre asignación de cargos, responsabilidades y procedimientos.

7.1.4 Contar con mecanismos eficaces de comunicación y con sistemas de información claramente establecidos y accesibles, implementados en escenarios internos y externos, con información relativa al programa educativo, docentes, procesos de admisión, entre otros.

7.1.5 Mecanismos confiables y seguros para la consulta, registro, actualización y archivo de la información académica de los estudiantes y los profesores adscritos al programa.

### **Estándares de mejoramiento**

El programa debería:

- Implementar sistemas de gestión de calidad orientados al mejoramiento continuo de la calidad de procesos y su certificación.
- Facilitar instancias y mecanismos eficientes de participación de la comunidad académica en la gestión del programa.

## CARACTERÍSTICA Nº 2 Mecanismos para evaluación y seguimiento del programa

### **Estándares básicos**

El programa debe:

- 7.2.1 Definir e implementar mecanismos sistemáticos y objetivos para hacer seguimiento al currículo, objetivos educativos, así como recursos y procesos educativos.
- 7.2.2 Usar los resultados del seguimiento y evaluación para el mejoramiento del currículo.
- 7.2.3 Dentro de los parámetros y mecanismos de evaluación realizar de manera continua la búsqueda, análisis y consideración de la realimentación de estudiantes, docentes, egresados y otras partes interesadas, frente a los diferentes aspectos del programa, los resultados educativos esperados y su impacto social.

### **Estándares de mejoramiento**

- En las acciones de seguimiento se deberían considerar aspectos relacionados con el contexto del proceso educativo, componentes específicos del currículo, su impacto social.
- Dar mayor objetividad y pertinencia a la evaluación a partir de la participación de entes externos, pares, referentes y expertos.

### CARACTERÍSTICA N° 3 Renovación y mejoramiento continuo del programa educativo

#### **Estándares básicos**

El programa debe:

- 7.3.1 Definir e implementar instancias y acciones para la constante actualización del programa, en cuanto a: Procesos, estructura, contenidos, ingreso de estudiantes, resultados, competencias, evaluación, y entorno de aprendizaje.
- 7.2.2 Realizar los ajustes y actualizaciones documentales y legales pertinentes.
- 7.2.3 Asignar recursos para el mejoramiento continuo del programa.

#### **Estándares de mejoramiento**

Los procesos de renovación del programa deberían

- Basarse en estudios prospectivos, análisis de la evaluación del contexto en salud local, regional, nacional e internacional, así como la literatura relacionada con la educación médica.

- Considerar aspectos relacionados con los cambios sociales en materia de ciencia, economía, salud, medio ambiente, cultura, demografía, política, trabajo, entre otros.
- Dar mayor objetividad y pertinencia a la evaluación a partir de la participación de entes externos, pares, referentes, expertos y partes interesadas.
